# Supplementary material for: A facile approach to fabricate porous UMCM-150 nanostructures and their adsorption behavior for methylene blue from aqueous solution
Source: Royal Society of Chemistry journal article supplement (doi:10.1039/c5ce00706b), 2015-01-01
Supplement: c5ce00706b1.pdf [file c5ce00706b1.pdf]

## *Electronic Supplementary Information (ESI)*

### **A facile approach to fabricate porous UMCM-150 nanostructures and their adsorption behavior for methylene blue from aqueous solution**

**Ji-Min Yang,<sup>a,b</sup> Qing Liu,<sup>a</sup> Yan-Shang Kang,<sup>a</sup> and Wei-Yin Sun<sup>\*a</sup>**

<sup>a</sup> *Coordination Chemistry Institute, State Key Laboratory of Coordination Chemistry, School of Chemistry and Chemical Engineering, Nanjing National Laboratory of Microstructures, Collaborative Innovation Center of Advanced Microstructures, Nanjing University, Nanjing 210093, China. E-mail: sunwy@nju.edu.cn; Fax: +86 25 83314502*

<sup>b</sup> *School of Chemistry & Chemical Engineering, Linyi University, Linyi 276005, China*

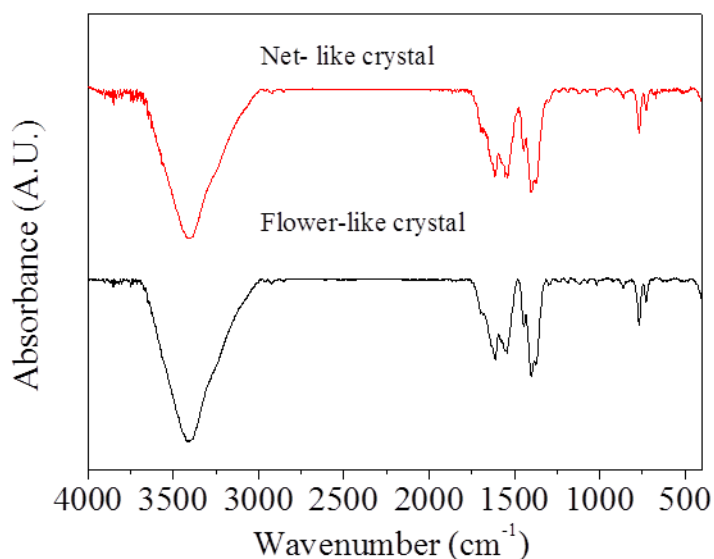

**Fig. S1** IR spectra of UMCM-150 nanostructures.

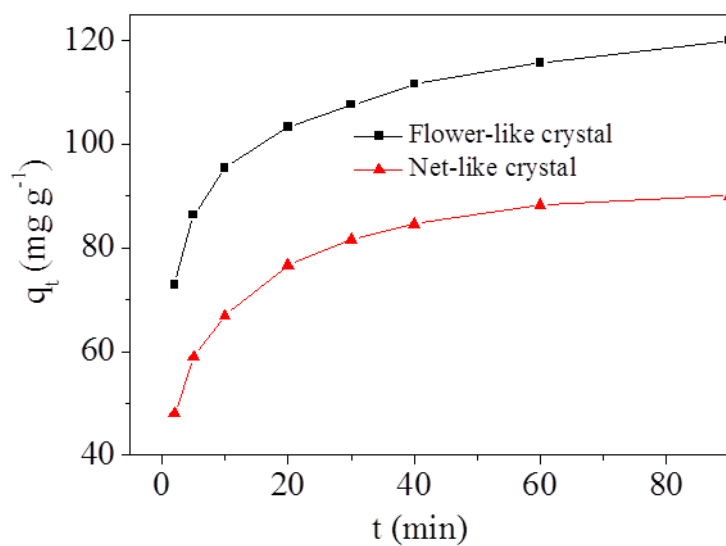

**Fig. S2** Effects of contact time on the MB adsorption of UMCM-150 nanostructures.

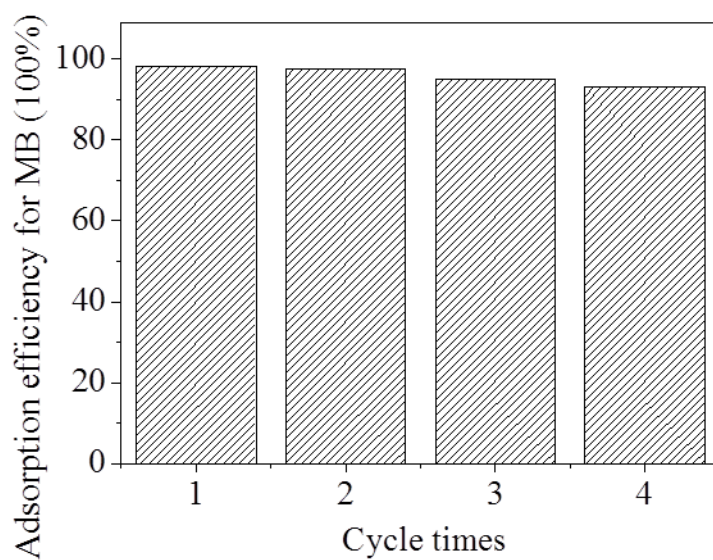

**Fig. S3** Recycle of the removal efficiency of UMCM-150 flower-like nanostructures for MB.

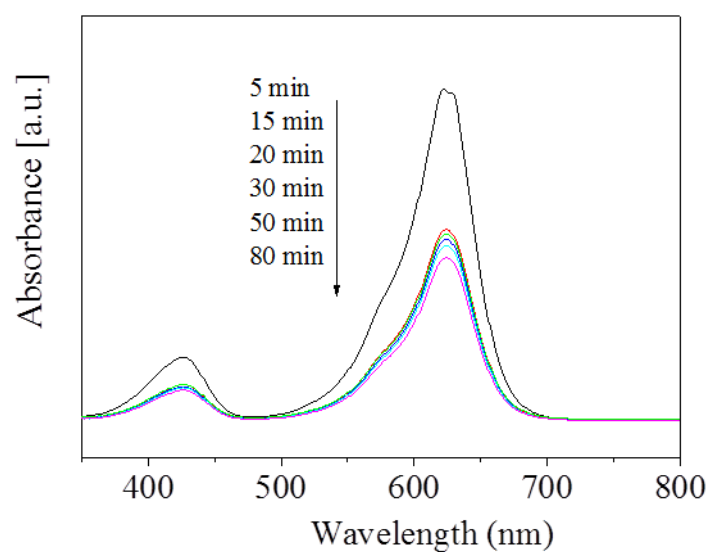

**Fig. S4** UV-vis spectra of a solution of brilliant green ( $20 \text{ mg L}^{-1}$ , 40 mL) in the presence of UMCM-150 (5 mg) at different time intervals.

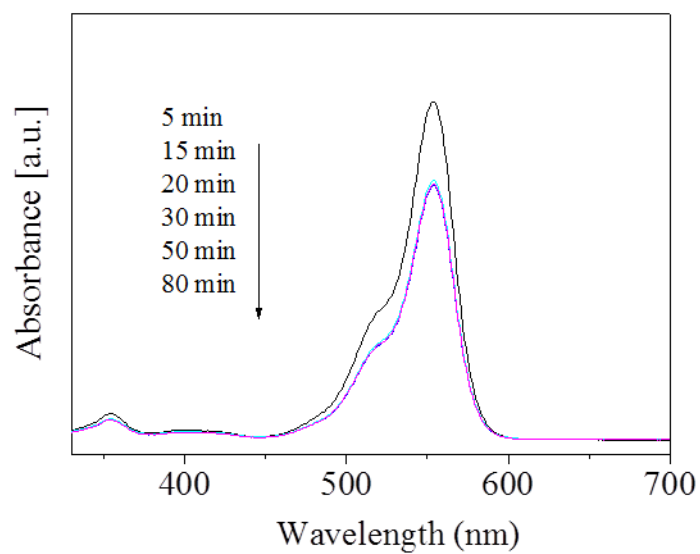

**Fig. S5** UV-vis spectra of a solution of Rhodamine B ( $20 \text{ mg L}^{-1}$ , 40 mL) in the presence of UMCM-150 (5 mg) at different time intervals.

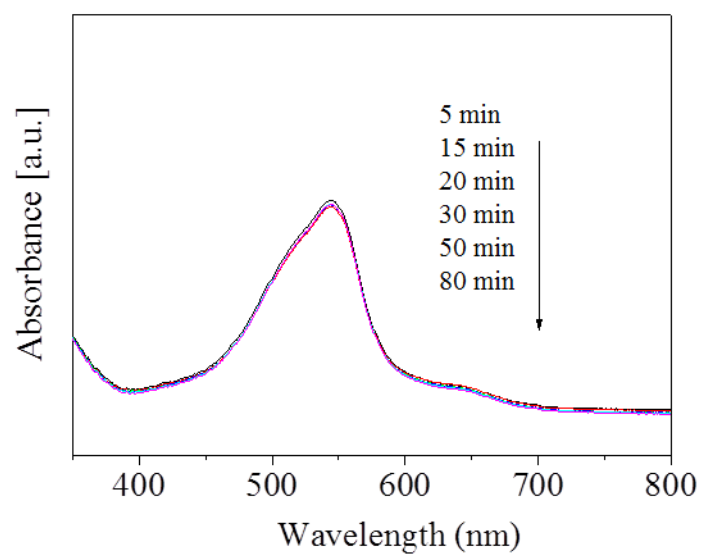

**Fig. S6** UV-vis spectra of a solution of acid chrome blue K ( $20 \text{ mg L}^{-1}$ , 40 mL) in the presence of UMCM-150 (5 mg) at different time intervals.

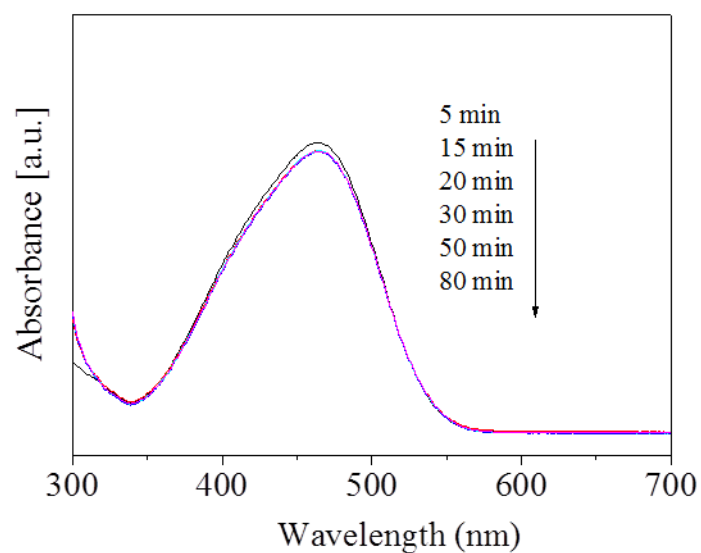

**Fig. S7** UV-vis spectra of a solution of methyl orange ( $20 \text{ mg L}^{-1}$ , 40 mL) in the presence of UMCM-150 (5 mg) at different time intervals.
